# Supplementary material
Source: PubMed Central journal article supplement (PMC9419073)
Supplement: NA-002-D0NA00745E-s001.pdf [file NA-002-D0NA00745E-s001.pdf]

**Supplementary figures**

**Effect of silver nanospheres and nanowires on human airway smooth muscle cells *in vitro*:  
role of sulfidation**

Charalambos Michaeloudes<sup>1</sup>, Joanna Seiffert<sup>1</sup>, Shu Chen<sup>2</sup>, Pakatip Ruenraroengsak<sup>2,3</sup>,  
Leo Bey<sup>2,4</sup>, Ioannis G. Theodorou<sup>2</sup>, Mary Ryan<sup>2</sup>, Xiaoxing Cui<sup>5</sup>, Jim Zhang<sup>5</sup>, Milo Shaffer<sup>2</sup>,  
Terry Tetley<sup>1</sup>, Alexandra E. Porter<sup>2</sup>, Kian Fan Chung<sup>1</sup>

<sup>1</sup>National Heart & Lung Institute, Imperial College, London SW3, UK; <sup>2</sup>Department of Materials and London Centre for Nanotechnology, Imperial College, London SW3, UK; <sup>3</sup> Faculty of Pharmacy, Mahidol University, Bangkok, Thailand, 10400; <sup>4</sup>Faculty of Medicine, University of Malaya, Kuala Lumpur 50603, MYS; <sup>5</sup>Nicholas School of Environment & Duke Global Health Institute, Duke University, Durham, USA

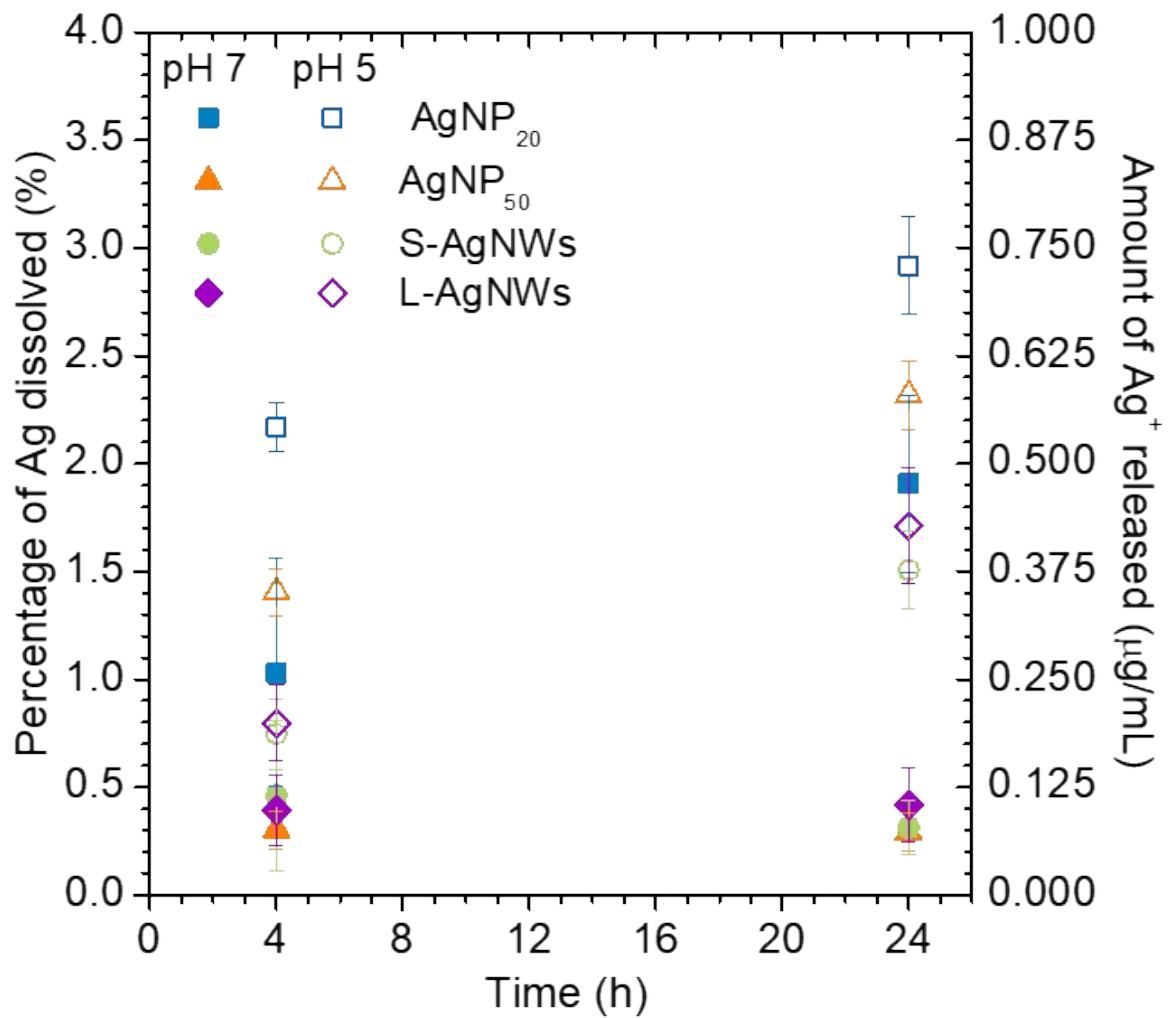

**Supplementary Figure 1**

ICP-OES analysis of the percentage and amount of free Ag<sup>+</sup> ions released from AgNP<sub>20</sub>, AgNP<sub>50</sub>, S-AgNWs, and the L-AgNWs, incubated in perchlorate buffer solutions with pH 7 (solid symbols) and pH 5 (open symbols), for 4 and 24 h. Adapted from (1, 2).

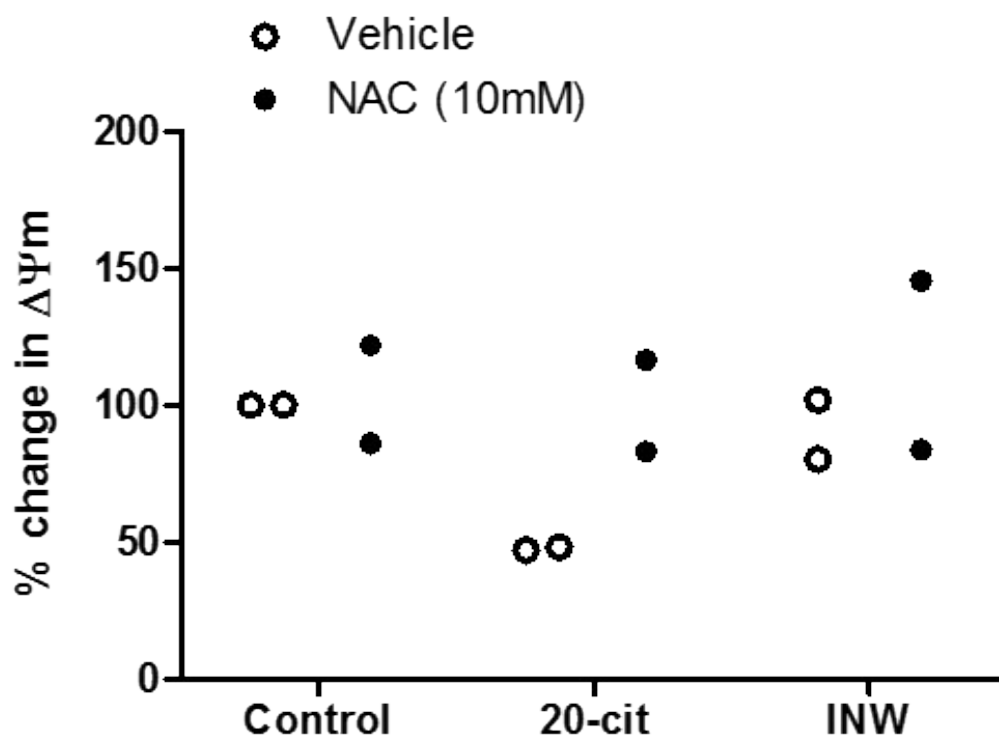

### Supplementary Figure 2.

Effect of N-acetylcysteine on silver nanosphere- and nanowire-dependent mitochondrial membrane potential. ASMCs were serum-starved overnight, pre-treated with N-acetylcysteine (NAC; 10mM) or vehicle for 1hr and then incubated with 20 $\mu$ m nanospheres (25  $\mu$ g/mL) or long nanowires (INW; 25  $\mu$ g/mL) for 72hrs. Changes in mitochondrial membrane potential ( $\Delta\Psi_m$ ) were determined using the JC-1 assay. Each data point represents results from one ASMC donor.

### References

1. Theodorou IG MK, Chen S, Goode AE, Yufit V, Ryan MP, Porter AE. . Silver Nanowire Particle Reactivity with Human Monocyte-Derived Macrophage Cells: Intracellular Availability of Silver Governs Their Cytotoxicity. ACS BIOMATERIALS SCIENCE & ENGINEERING 3(10): 2017 :2336-47.
2. Leo BF, Chen S, Kyo Y, Herpoldt KL, Terrill NJ, Dunlop IE, et al. The stability of silver nanoparticles in a model of pulmonary surfactant. Environmental science & technology. 2013;47(19):11232-40.
